# Supplementary material for: A systematic review with network meta-analysis on mono strategy of anaesthesia for preeclampsia in caesarean section
Source: PubMed Central journal article supplement (PMC7970950; doi:10.1038/s41598-021-85179-5), 2021-03-11
Supplement: 41598_2021_85179_MOESM1_ESM.pdf [file 41598_2021_85179_MOESM1_ESM.pdf]

## APPENDIX

### Appendix 1. Quality of the included randomized controlled trials

| <b>First author's family name</b> | <b>Randomization</b>    | <b>Allocation</b>       | <b>Blinding</b> | <b>Loss-follow up</b> | <b>Type of analysis</b> | <b>Selective Report</b> | <b>Other source of bias</b> |
|-----------------------------------|-------------------------|-------------------------|-----------------|-----------------------|-------------------------|-------------------------|-----------------------------|
| Hodgkinson<br>1980                | Unclear<br>(no details) | Unclear<br>(no details) | No blinding     | 0                     | ITT                     | Low risk                | Low risk                    |
| Ramanathan<br>1991                | Unclear<br>(no details) | Unclear<br>(no details) | No blinding     | 0                     | ITT                     | Low risk                | Low risk                    |
| Wallace<br>1995                   | Random table            | Sealed envelope         | No blinding     | 0                     | ITT                     | Low risk                | Low risk                    |
| Sharwood<br>1999                  | Unclear<br>(no details) | Unclear<br>(no details) | No blinding     | 25%                   | ITT                     | Low risk                | Low risk                    |
| Mathur<br>2002                    | Unclear<br>(no details) | Unclear<br>(no details) | No blinding     | 0                     | ITT                     | Low risk                | Low risk                    |
| Dyer<br>2003                      | Unclear<br>(no details) | Sealed envelope         | No blinding     | 0                     | ITT                     | Low risk                | Low risk                    |
| Visalyaputra<br>2005              | Random table            | Sealed envelope         | No blinding     | 4.2%                  | ITT                     | Low risk                | Low risk                    |
| Moslemi<br>2007                   | Unclear<br>(no details) | Unclear<br>(no details) | No blinding     | 0                     | ITT                     | Low risk                | Low risk                    |
| Dasgupta<br>2011                  | Unclear<br>(no details) | Sealed envelope         | No blinding     | 4.8%                  | ITT                     | Low risk                | Low risk                    |
| Kinzhalova<br>2012                | Unclear<br>(no details) | Envelope                | No blinding     | 0                     | ITT                     | Low risk                | Low risk                    |
| Chattopadhyay<br>2014             | Unclear<br>(no details) | Unclear<br>(no details) | No blinding     | 0                     | ITT                     | Low risk                | Low risk                    |
| Sivevski<br>2015                  | Unclear<br>(no details) | Unclear<br>(no details) | No blinding     | 0                     | ITT                     | Low risk                | Low risk                    |

**Appendix 1.** Quality of the included randomized controlled trials

| <b>First author's family name</b> | <b>Selection bias</b> | <b>Performance bias</b> | <b>Detection bias</b> | <b>Attrition bias</b> | <b>Reporting bias</b> | <b>Other source of bias</b> |
|-----------------------------------|-----------------------|-------------------------|-----------------------|-----------------------|-----------------------|-----------------------------|
| Hodgkinson 1980                   | Unclear               | High risk               | High risk             | Low risk              | Low risk              | Low risk                    |
| Ramanathan 1991                   | Unclear               | High risk               | High risk             | Low risk              | Low risk              | Low risk                    |
| Wallace 1995                      | Low risk              | High risk               | High risk             | Low risk              | Low risk              | Low risk                    |
| Sharwood 1999                     | Unclear               | High risk               | High risk             | High risk             | Low risk              | Low risk                    |
| Mathur 2002                       | Unclear               | High risk               | High risk             | Low risk              | Low risk              | Low risk                    |
| Dyer 2003                         | Unclear               | High risk               | High risk             | Low risk              | Low risk              | Low risk                    |
| Visalyaputra 2005                 | Low risk              | High risk               | High risk             | Low risk              | Low risk              | Low risk                    |
| Moslemi 2007                      | Unclear               | High risk               | High risk             | Low risk              | Low risk              | Low risk                    |
| Dasgupta 2011                     | Unclear               | High risk               | High risk             | Low risk              | Low risk              | Low risk                    |
| Kinzhalova 2012                   | Unclear               | High risk               | High risk             | Low risk              | Low risk              | Low risk                    |
| Chattopadhyay 2014                | Unclear               | High risk               | High risk             | Low risk              | Low risk              | Low risk                    |
| Sivevski 2015                     | Unclear               | High risk               | High risk             | Low risk              | Low risk              | Low risk                    |

**Appendix 2.** Cumulative probability ranking of MAP before delivery

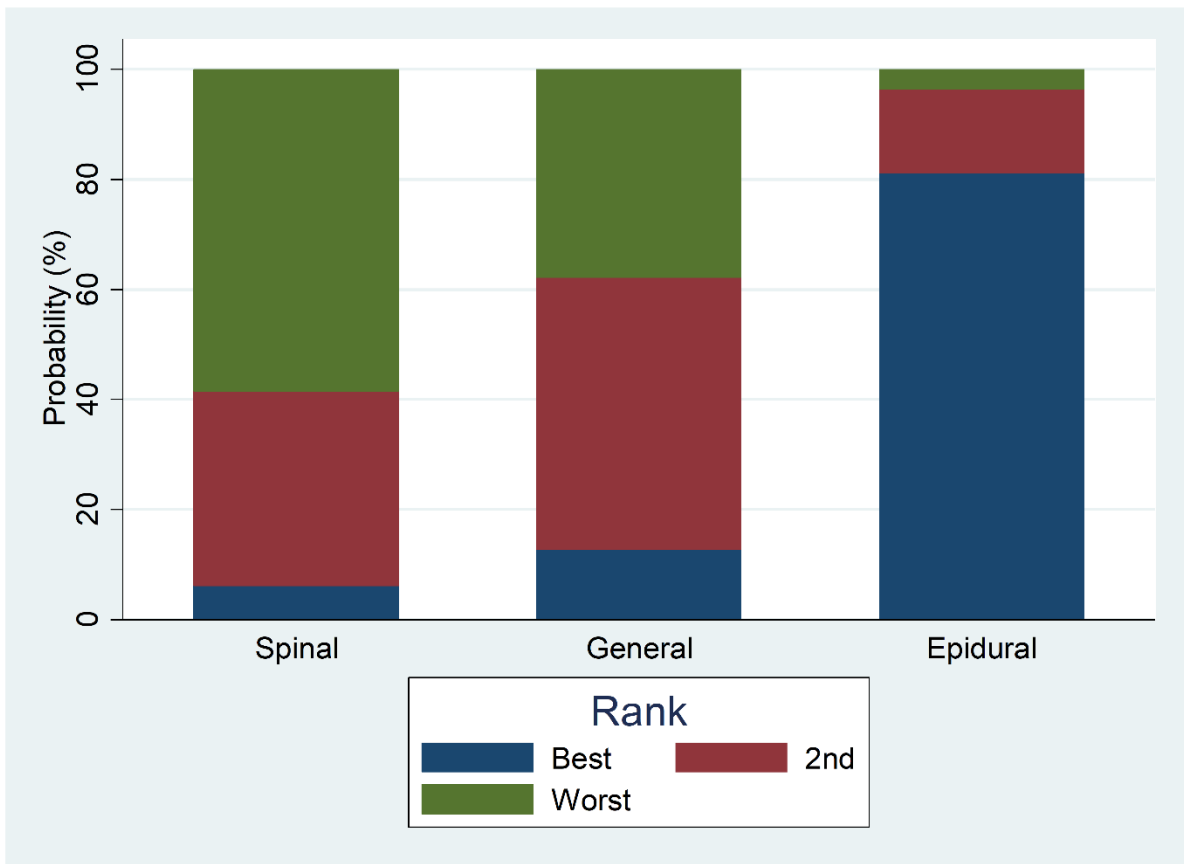

Treatment Relative Ranking of Model 1

| Treatment | SUCRA | PrBest | MeanRank |
|-----------|-------|--------|----------|
| Spinal    | 23.8  | 6.2    | 2.5      |
| General   | 37.5  | 12.7   | 2.3      |
| Epidural  | 88.7  | 81.1   | 1.2      |

**Appendix 3.** Loop inconsistency test of MAP before delivery

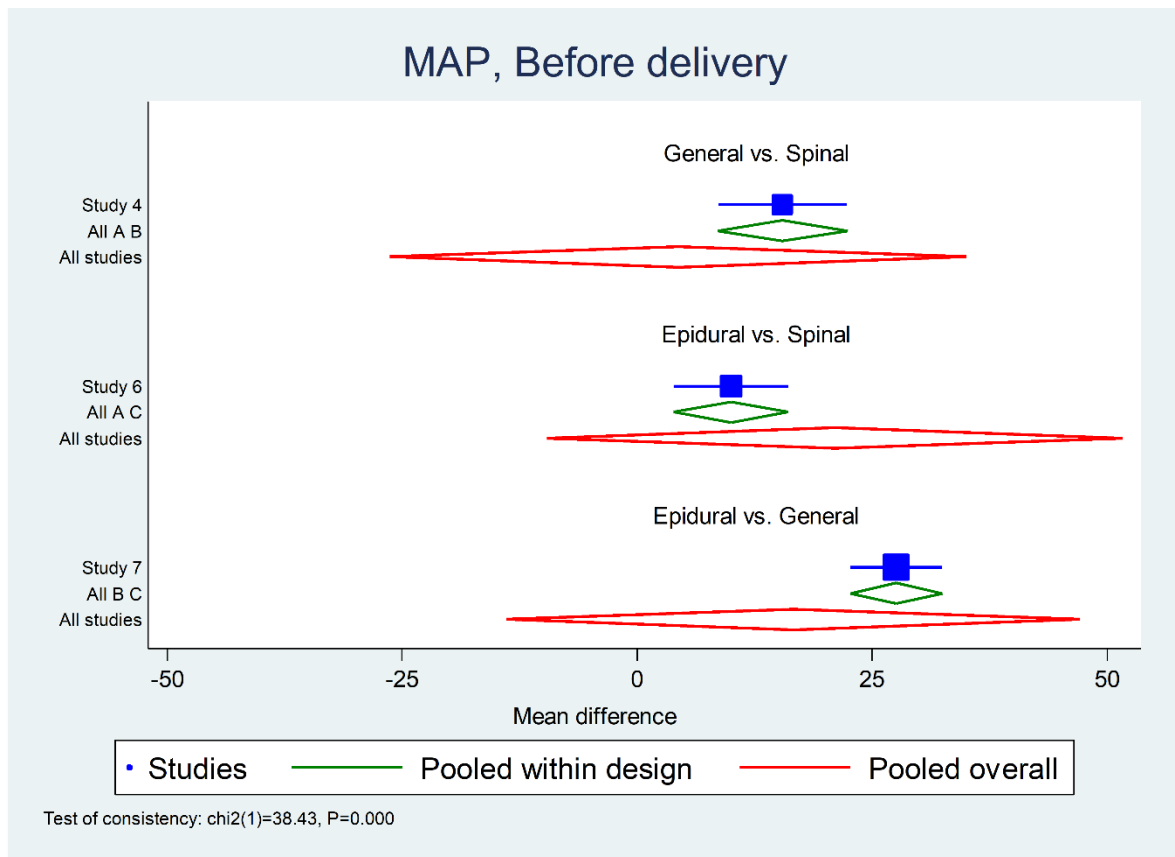

#### Appendix 4. Publication bias test of MAP before delivery

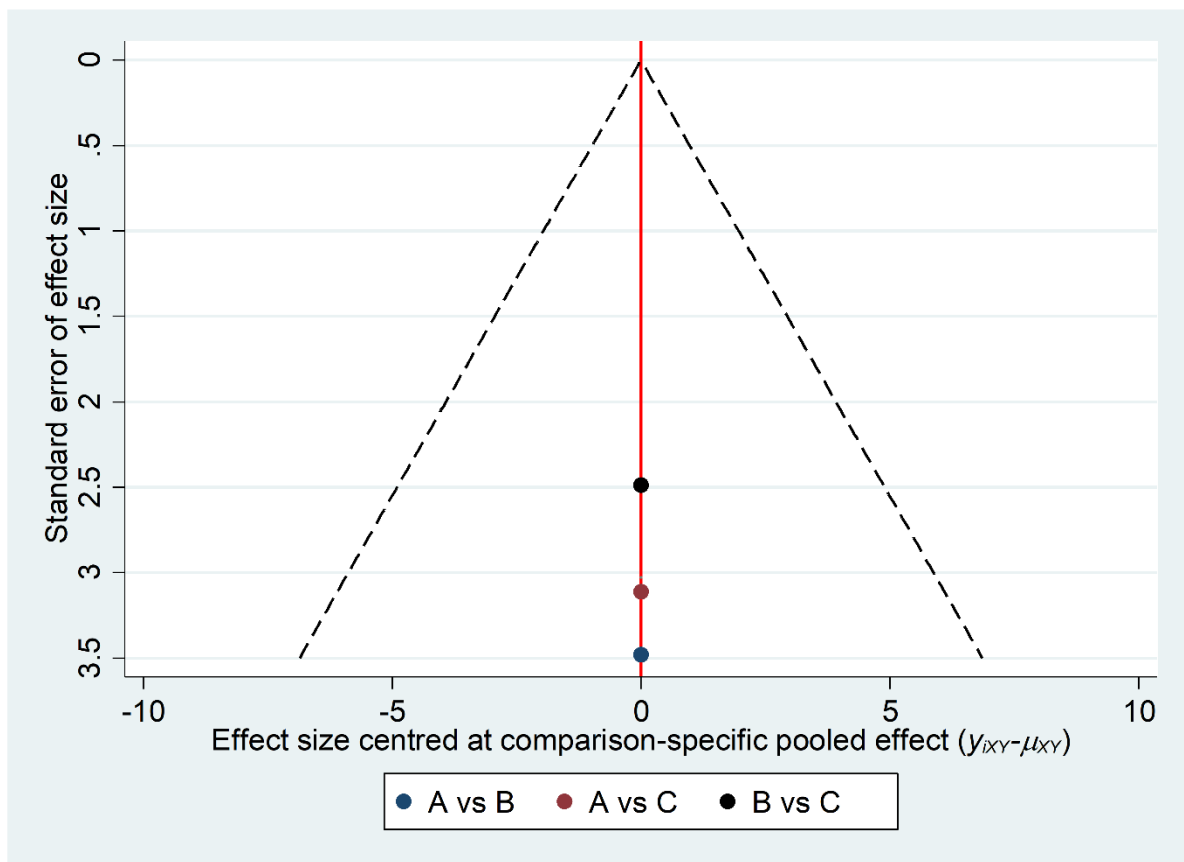



## Appendix 6. Forest plot of maternal heart rate

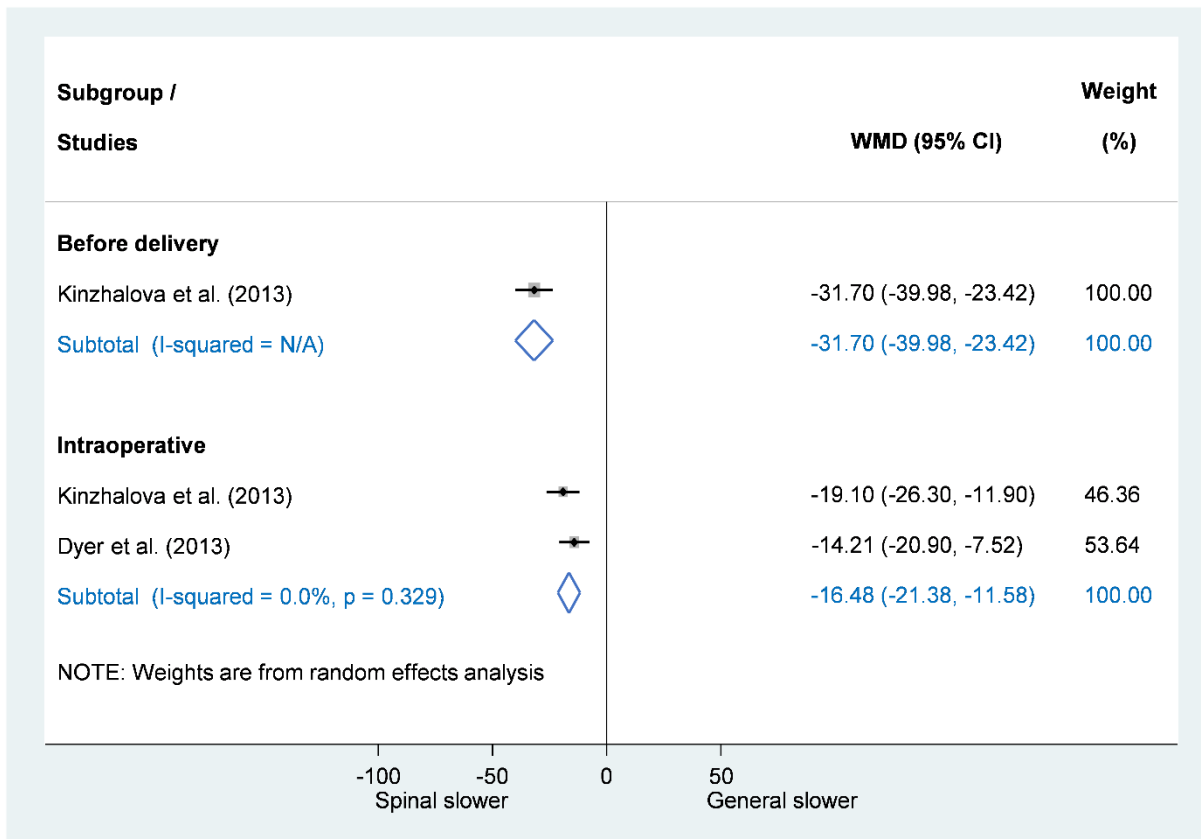

## Appendix 7. Forest plot of maternal systemic vascular resistance

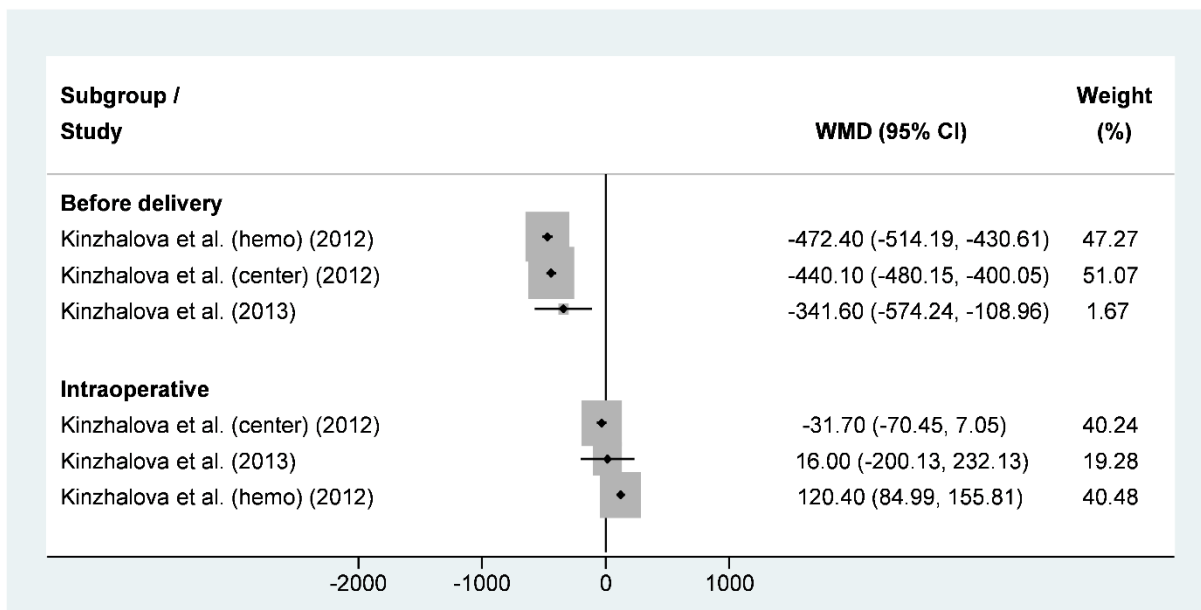

**Appendix 8.** Inconsistency test of vasopressor usage rate

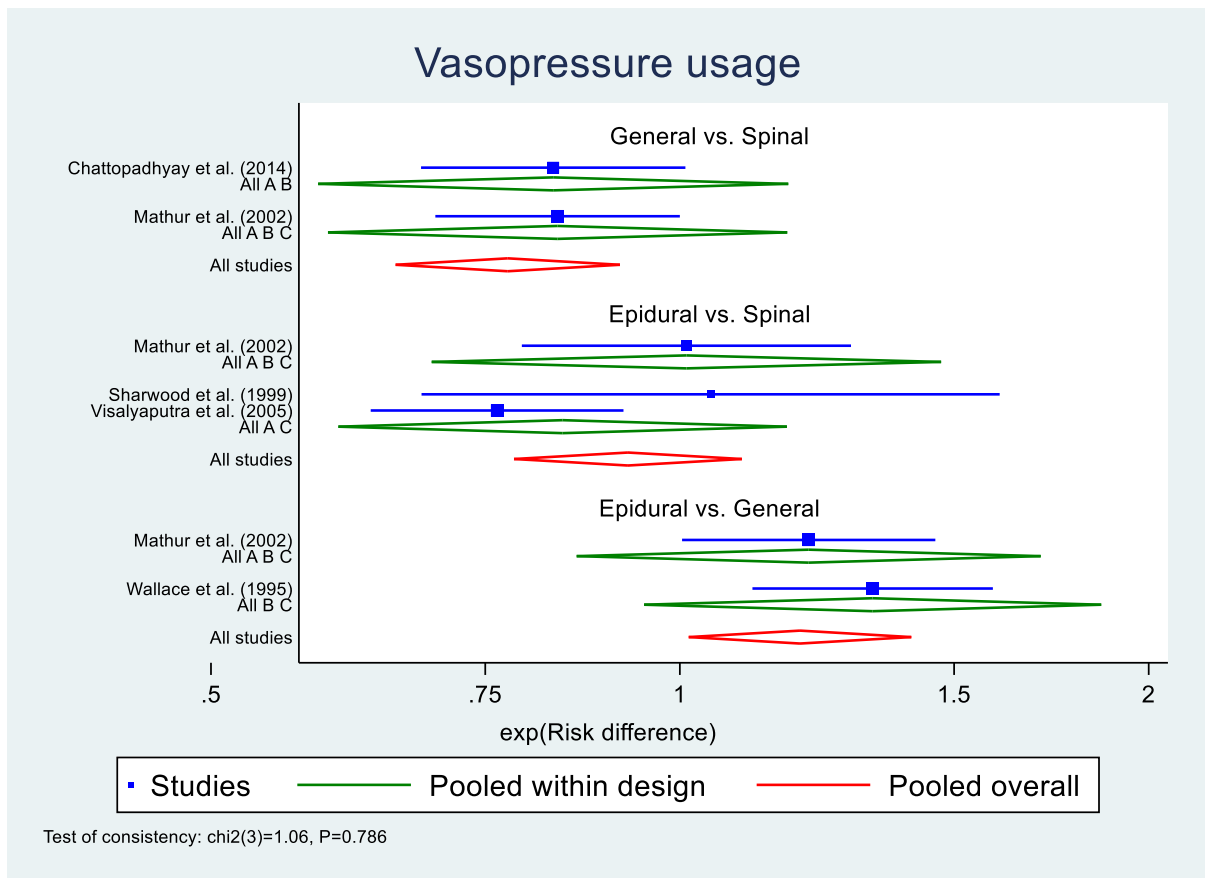



**Appendix 9.** Publication bias test of vasopressor usage rate

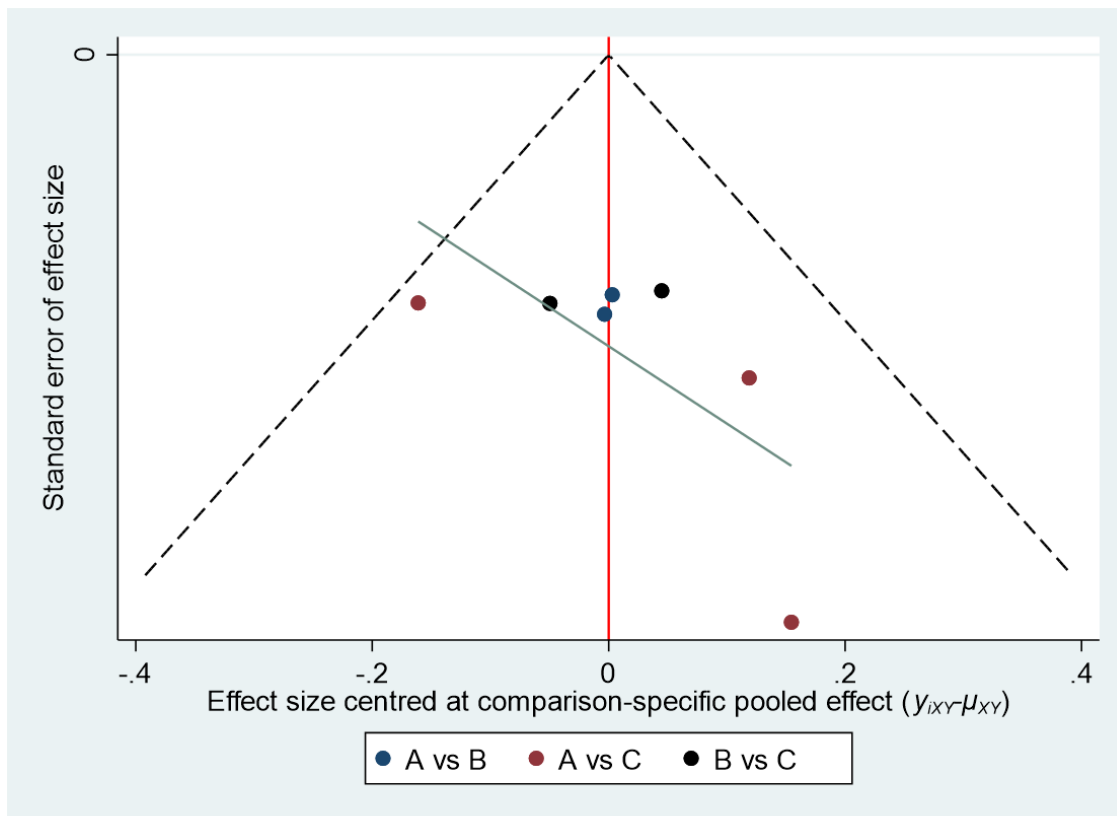

Number of studies = 7 Root MSE = .8461

---

| Std_Eff | Coef.     | Std. Err. | t     | P> t  | [95% Conf. Interval] |
|---------|-----------|-----------|-------|-------|----------------------|
| slope   | -.1933366 | .1485781  | -1.30 | 0.250 | -.5752686 .1885955   |
| bias    | 1.801457  | 1.426623  | 1.26  | 0.262 | -1.865795 5.468709   |

---

Test of H0: no small-study effects P = 0.262



**Appendix 11.** Network plot of maternal adverse event

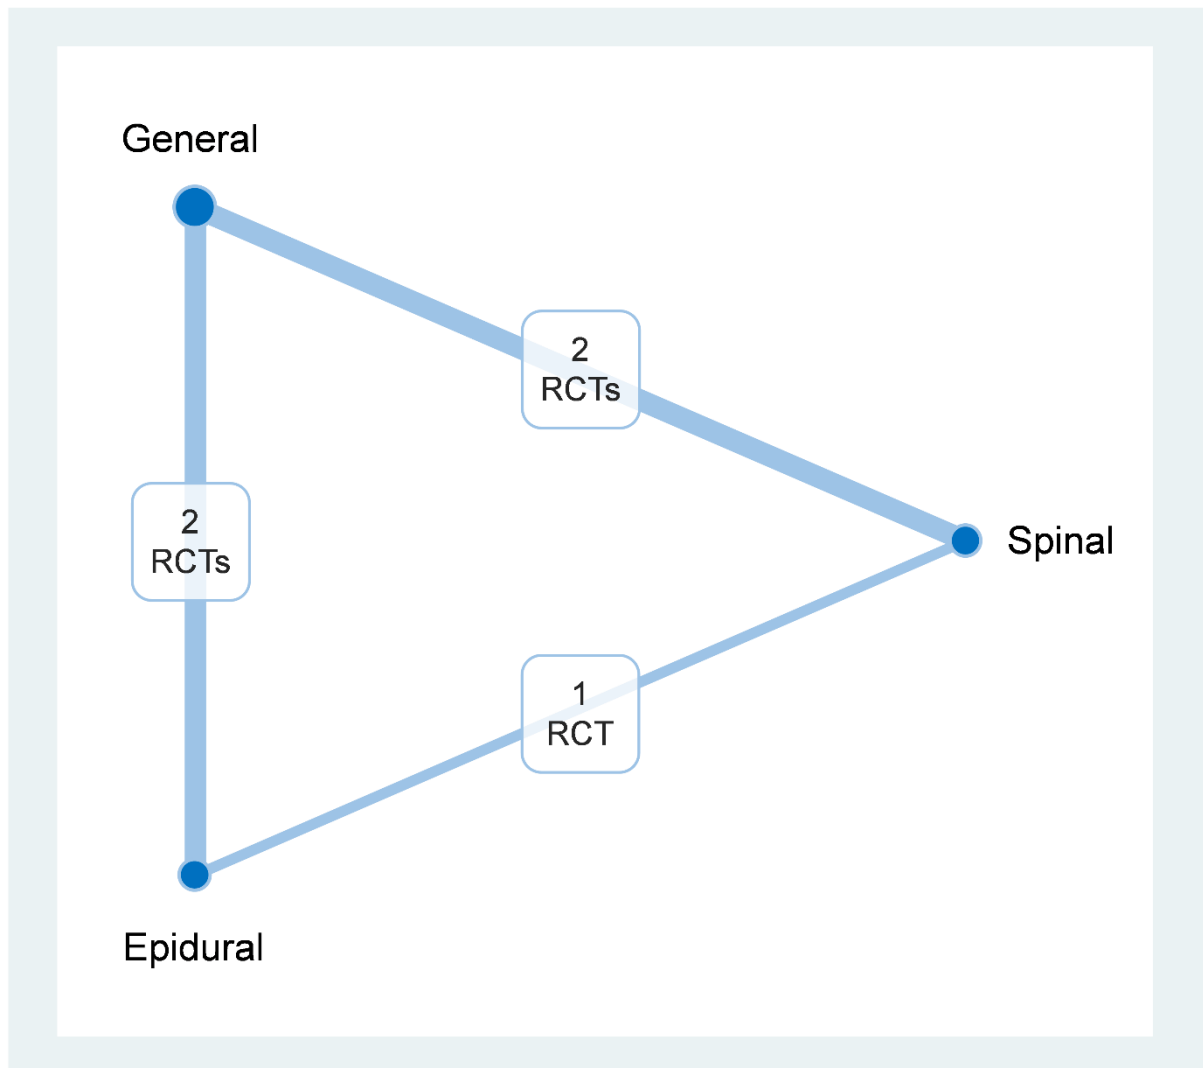

**Appendix 12.** Forest plot of maternal adverse event

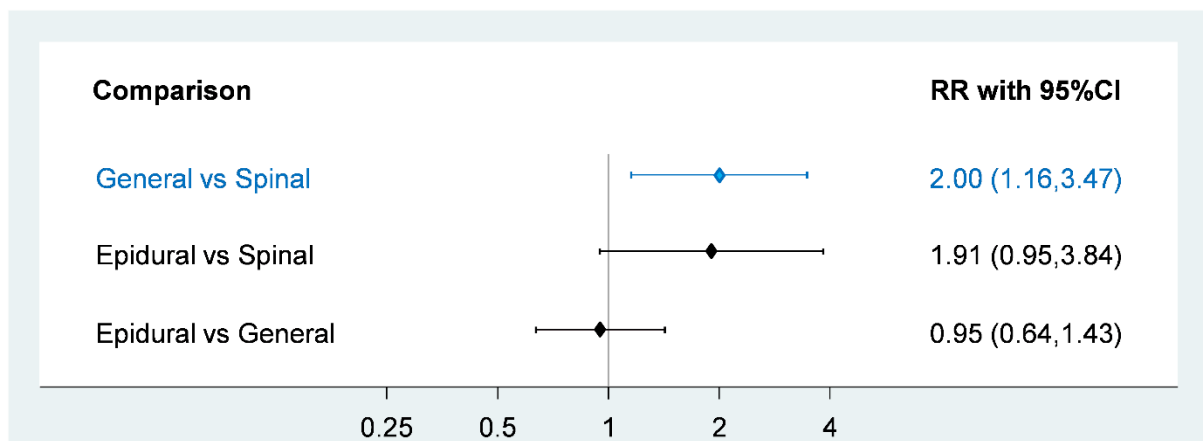

**Appendix 13.** Loop inconsistency test of maternal adverse event

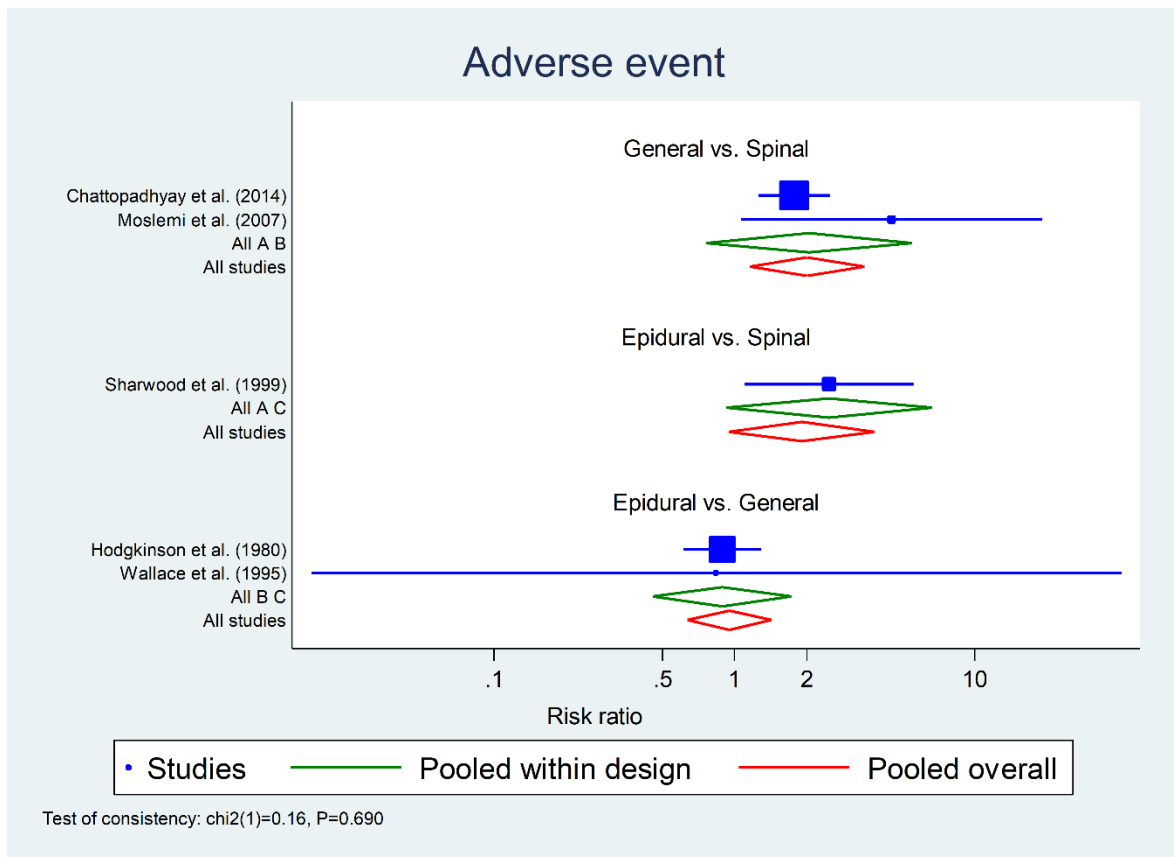



**Appendix 15.** Loop inconsistency test of 5-min APGAR scores

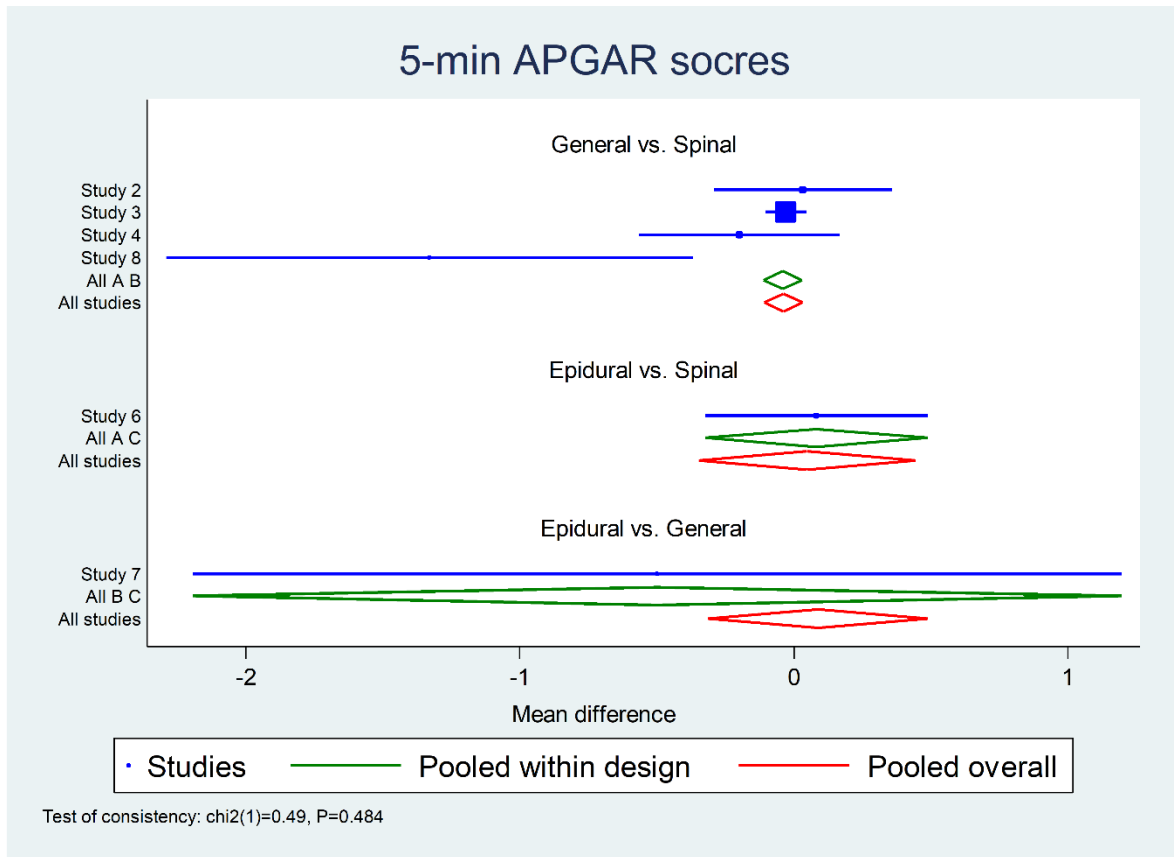

**Appendix 16.** Loop inconsistency test of 1-min APGAR scores

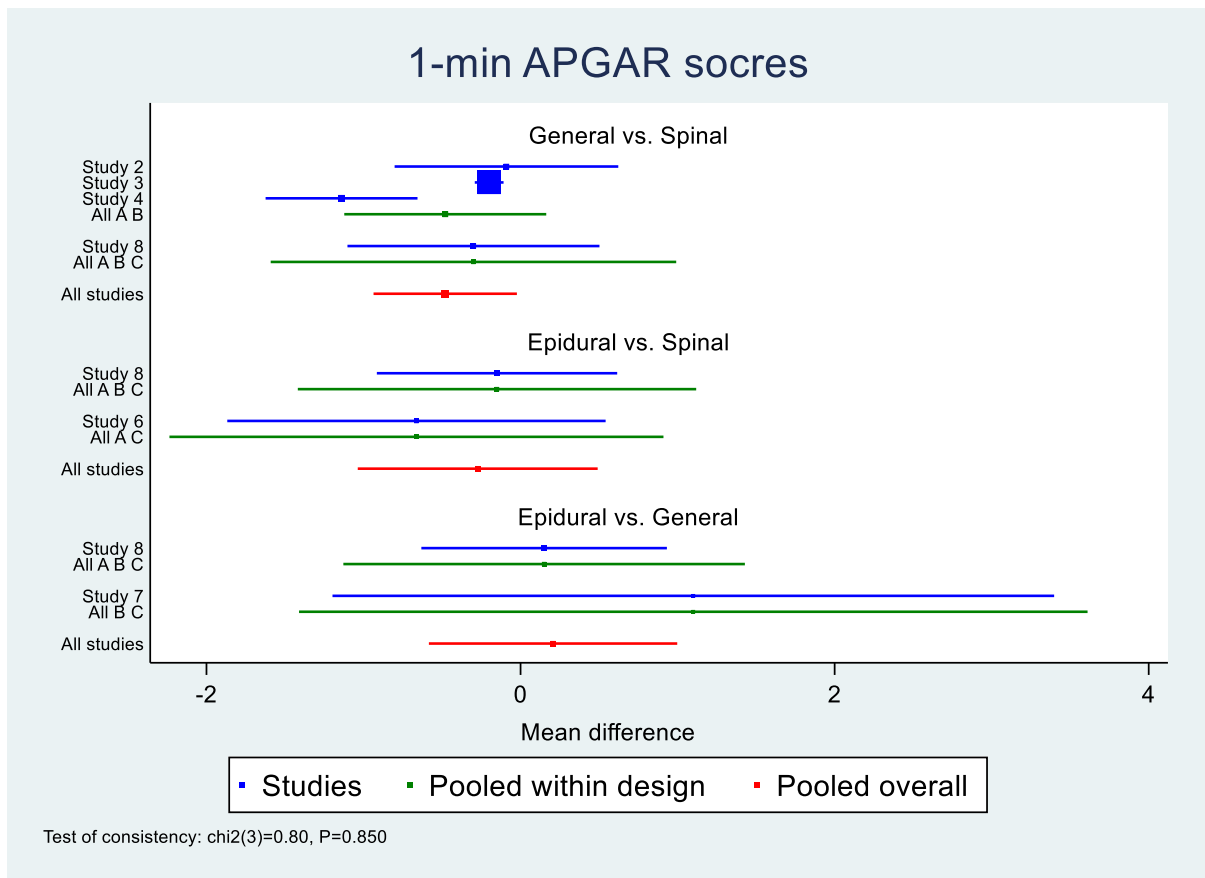





**Appendix 18.** Publication bias test of 1-min APGAR scores

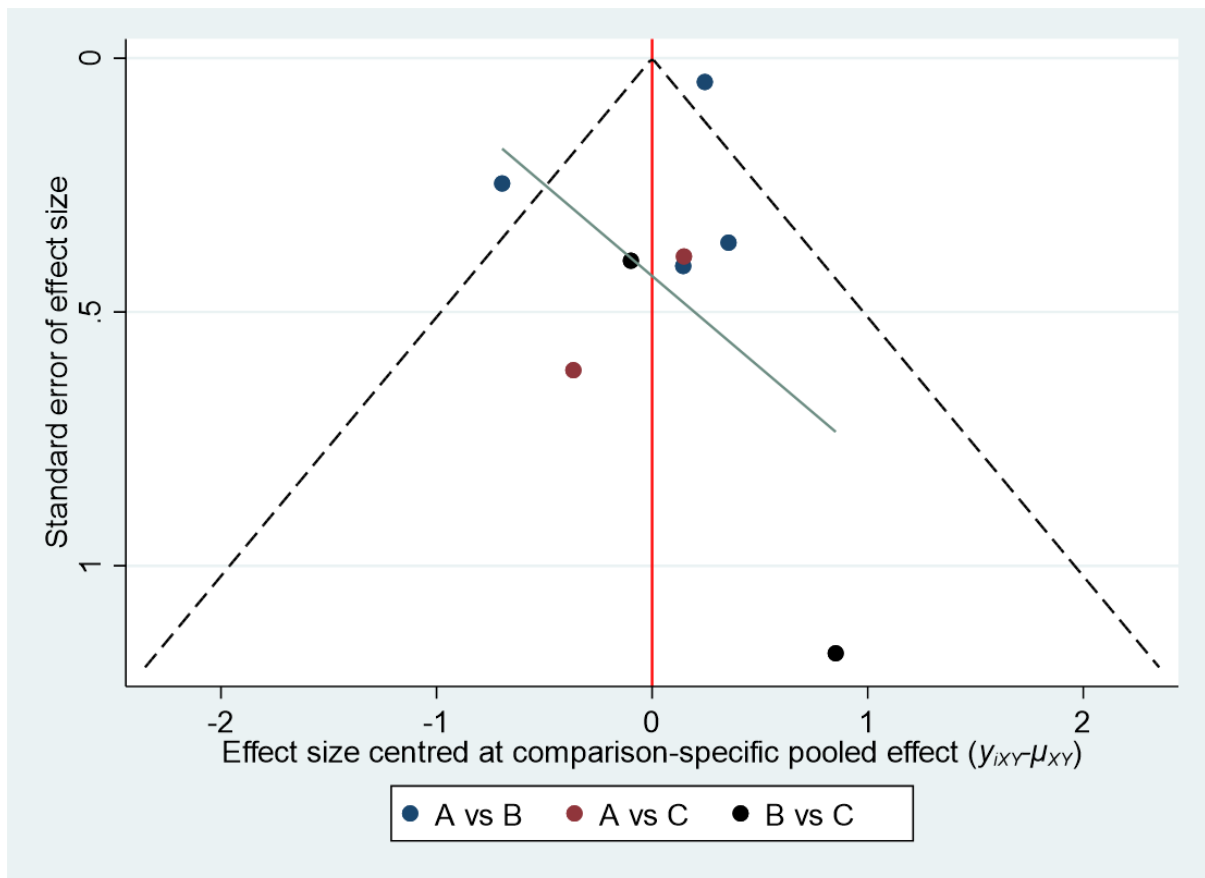

Number of studies = 8 Root MSE = 1.474

---

| Std_Eff | Coef.    | Std. Err. | t     | P> t  | [95% Conf. Interval] |          |
|---------|----------|-----------|-------|-------|----------------------|----------|
| slope   | .2637685 | .0822443  | 3.21  | 0.018 | .0625238             | .4650131 |
| bias    | -.759859 | .652469   | -1.16 | 0.288 | -2.356393            | .8366752 |

---

Test of H0: no small-study effects P = 0.288

**Appendix 19.** Network plot of neonatal resuscitation

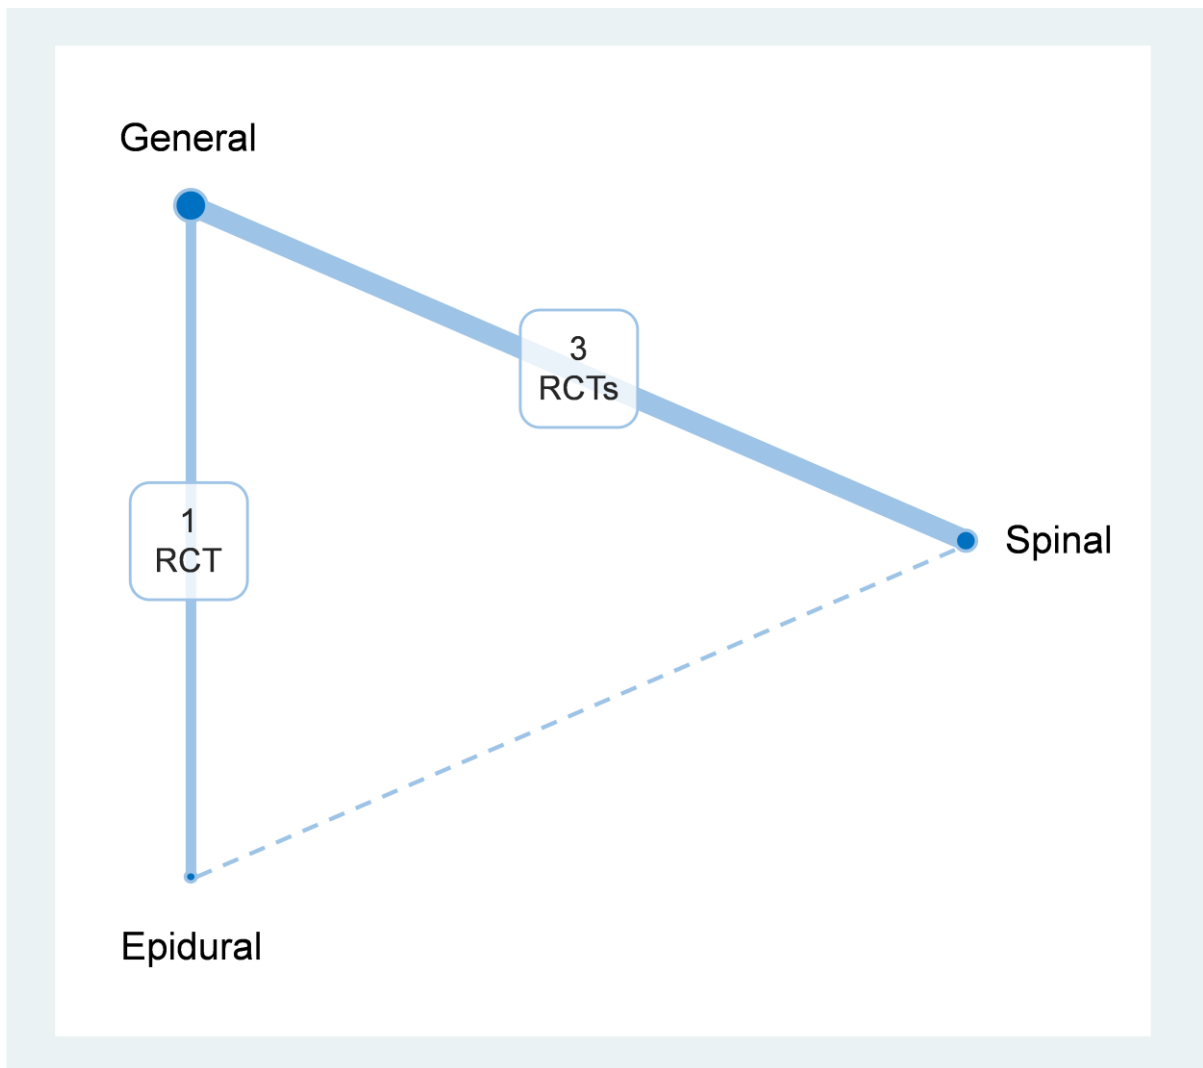

**Appendix 20.** Forest plot of neonatal resuscitations

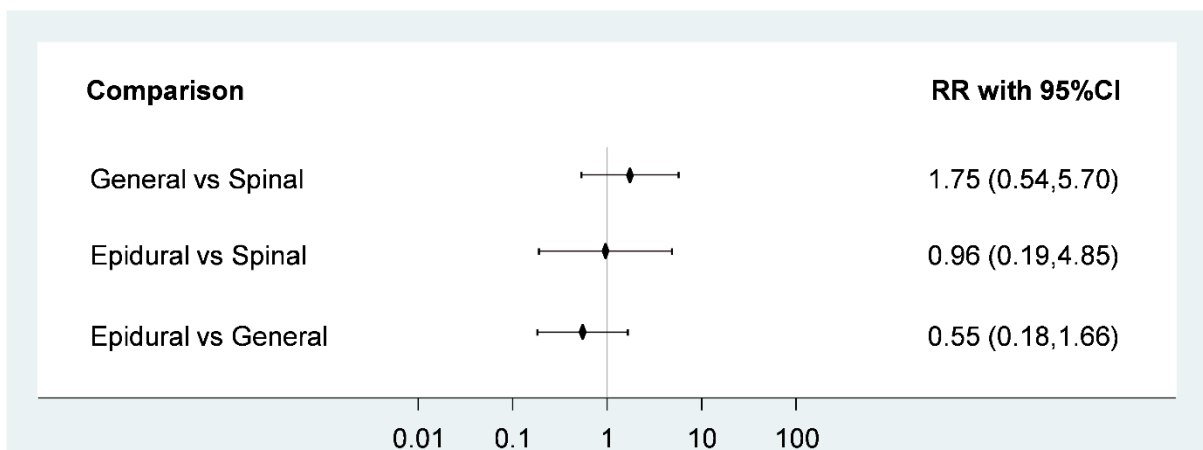



## Appendix 22. Search strategy

### Primary search strategy

- #1. preeclampsia
  - #2. pregnancy toxemia
  - #3. gestosis
  - #4. eph
  - #5. #1 OR #2 OR #3 OR #4
  - #6. general anesthesia
  - #7. epidural anesthesia
  - #8. spinal anesthesia
  - #9. anesthesia
  - #10. lumbar anesthesia
  - #11. combined spinal epidural anesthesia
  - #12. analgesia
  - #13. #6 OR #7 OR #8 OR #9 OR #10 OR #11 OR #12
  - #14. #5 AND #13
- No filter.

### Syntax in Embase :

('preeclampsia'/exp OR 'pre eclampsia' OR 'pre-eclampsia' OR 'pre-eclamptic toxemia' OR 'pre-eclamptic toxemia' OR 'preeclampsia' OR 'preeclampsia' OR 'preeclamptic toxemia' OR 'preeclamptic toxemia' OR 'toxemia, preeclamptic' OR 'toxemia, preeclamptic' OR 'pregnancy toxemia'/exp OR 'eph gestosis' OR 'eclamptic toxemia' OR 'eclamptic toxemia' OR 'eclamptogenic toxemia' OR 'eclamptogenic toxemia' OR 'eph syndrome' OR 'gestational toxemia' OR 'gestational toxemia' OR 'gestational toxicosis' OR 'gestosis' OR 'gestosis, eph' OR 'hep syndrome' OR 'pregnancy toxemia' OR 'pregnancy toxemias' OR 'pregnancy toxemia' OR 'pregnancy toxemias' OR 'pregnancy toxicosis' OR 'toxemia gravidum' OR 'toxemia gravidum' OR 'toxemic pregnancy' OR 'toxicosis gravidarum') AND ('anesthesiological procedure'/exp OR 'anaesthesia and analgesia' OR 'anesthesia and analgesia' OR 'anesthesiological procedure' OR 'anesthesiological techniques' OR 'spinal anesthesia'/exp OR 'anaesthesia, spinal' OR 'anaesthesia, subarachnoid' OR 'analgesia spinal' OR 'anesthesia, spinal' OR 'anesthesia, subarachnoid' OR 'complete spinal block' OR 'lumbar anaesthesia' OR 'lumbar anesthesia' OR 'lumbar extradural blockade' OR 'partial spinal block' OR 'rachianaesthesia' OR 'rachianesthesia' OR 'spinal anaesthesia' OR 'spinal anaesthetic' OR 'spinal analgesia' OR 'spinal anesthesia' OR 'spinal block' OR 'spinal cord anaesthesia' OR 'spinal cord anesthesia' OR 'subarachnoid anaesthesia' OR 'subarachnoid anesthesia' OR 'subarachnoid block' OR 'subarachnoidal anaesthesia' OR 'subarachnoidal anesthesia' OR 'epidural anesthesia'/exp OR 'anaesthesia, epidural' OR 'anaesthesia, peridural' OR 'anesthesia, epidural' OR 'anesthesia, peridural' OR 'dural blocking' OR 'epidural anaesthesia' OR 'epidural anaesthetic agent' OR 'epidural anesthesia' OR 'epidural anesthetic agent' OR 'epidural block' OR 'epidural blockade' OR 'extradural anaesthesia' OR 'extradural anesthesia' OR 'extradural block' OR 'lumbar epidural anaesthesia' OR 'lumbar epidural anesthesia' OR 'lumbar peridural anaesthesia' OR 'lumbar peridural anesthesia' OR 'lumbar peridural block' OR 'peridural anaesthesia' OR 'peridural anesthesia' OR 'peridural block' OR 'peridural blocking' OR 'general anesthesia'/exp OR 'anaesthesia, general' OR 'anesthesia, general' OR 'general anaesthesia' OR 'general anesthesia' OR 'combined spinal epidural anesthesia'/exp OR 'anesthetic agent'/exp OR 'anaesthetic' OR 'anaesthetic agent' OR 'anaesthetic drug' OR 'anaesthetics' OR 'anaesthetics, combined' OR 'anaesthetics, dissociative' OR 'anaesthetics, general' OR 'anesthetic' OR 'anesthetic agent' OR 'anesthetic drug' OR 'anesthetics' OR 'anesthetics, combined' OR 'anesthetics, dissociative' OR 'anesthetics, general' OR 'general anaesthetic' OR 'general anaesthetic agent' OR 'general anesthetic' OR 'general anesthetic agent' OR 'preanaesthetics' OR 'preanesthetics' OR 'analgesic agent'/exp OR 'agent, analgesic' OR 'analgesic' OR 'analgesic agent' OR 'analgesic drug' OR 'analgesic evaluation' OR 'analgesic tv 393' OR 'analgesics' OR 'analgesics, non narcotic' OR 'analgesics, non-narcotic' OR 'analgesics, topical' OR 'analgetic' OR 'analgetic agent' OR 'analgetic drug' OR 'anodyne' OR 'antalgic agent' OR 'non narcotic analgesic' OR 'non narcotic analgesic agent' OR 'nonnarcotic analgesic' OR 'nonnarcotic analgesic agent' OR 'epidural analgesia'/exp OR 'analgesia, epidural' OR 'epidural analgesia' OR 'extradural analgesia' OR 'peridural analgesia') AND ('cesarean section'/exp OR 'birth, abdominal operation' OR 'birth, caesarean' OR 'caesarean birth' OR 'caesarean section' OR 'caesarian birth' OR 'caesarian section' OR 'cesarean delivery' OR 'cesarean section' OR 'cesarian section' OR 'elective repeat cesarean section' OR 'fetectomy' OR 'repeated cesarotomy' OR 'sectio caesarea')

## Syntax in Cochrane Database of Systematic Reviews and Cochrane Central Register of Controlled Trials :

(preeclampsia OR pregnancy toxemia OR gestosis OR eph) AND (general anesthesia OR epidural anesthesia OR spinal anesthesia OR anesthesia OR lumbar anesthesia OR combined spinal epidural anesthesia OR analgesia)

## Syntax in New PubMed :

(((((("pre-eclampsia"[MeSH Terms] OR "pre eclampsia"[All Fields]) OR "preeclampsia"[All Fields]) OR (((("pregnancy toxemia"[All Fields] OR "pre-eclampsia"[MeSH Terms]) OR "pre eclampsia"[All Fields]) OR ("pregnancy"[All Fields] AND "toxemia"[All Fields])) OR "pregnancy toxemia"[All Fields])) OR "gestosis"[All Fields]) OR "eph"[All Fields]) AND (((((((("general anaesthesia"[All Fields] OR "anesthesia, general"[MeSH Terms]) OR ("anesthesia"[All Fields] AND "general"[All Fields])) OR "general anesthesia"[All Fields]) OR ("general"[All Fields] AND "anesthesia"[All Fields])) OR (((("epidural anaesthesia"[All Fields] OR "anesthesia, epidural"[MeSH Terms]) OR ("anesthesia"[All Fields] AND "epidural"[All Fields])) OR "epidural anesthesia"[All Fields]) OR ("epidural"[All Fields] AND "anesthesia"[All Fields]))) OR (((("spinal anaesthesia"[All Fields] OR "anesthesia, spinal"[MeSH Terms]) OR ("anesthesia"[All Fields] AND "spinal"[All Fields])) OR "spinal anesthesia"[All Fields]) OR ("spinal"[All Fields] AND "anesthesia"[All Fields]))) OR (((("anaesthesia"[All Fields] OR "anesthesia"[MeSH Terms]) OR "anesthesia"[All Fields]) OR "anaesthesias"[All Fields]) OR "anesthesias"[All Fields])) OR (((((((("lumbarised"[All Fields] OR "lumbarization"[All Fields]) OR "lumbarized"[All Fields]) OR "lumbars"[All Fields]) OR "lumbosacral region"[MeSH Terms]) OR ("lumbosacral"[All Fields] AND "region"[All Fields])) OR "lumbosacral region"[All Fields]) OR "lumbar"[All Fields]) AND (((("anaesthesia"[All Fields] OR "anesthesia"[MeSH Terms]) OR "anesthesia"[All Fields]) OR "anaesthesias"[All Fields]) OR "anesthesias"[All Fields]))) OR (((((((("combinable"[All Fields] OR "combinated"[All Fields]) OR "combination"[All Fields]) OR "combinational"[All Fields]) OR "combinations"[All Fields]) OR "combinative"[All Fields]) OR "combine"[All Fields]) OR "combined"[All Fields]) OR "combines"[All Fields]) OR "combining"[All Fields]) AND (((("spinal"[All Fields] OR "spinalization"[All Fields]) OR "spinalized"[All Fields]) OR "spinally"[All Fields]) OR "spinals"[All Fields]) AND (((("epidural anaesthesia"[All Fields] OR "anesthesia, epidural"[MeSH Terms]) OR ("anesthesia"[All Fields] AND "epidural"[All Fields])) OR "epidural anesthesia"[All Fields]) OR ("epidural"[All Fields] AND "anesthesia"[All Fields]))) OR (("analgesia"[MeSH Terms] OR "analgesia"[All Fields]) OR "analgesias"[All Fields]))))
